# Supplementary material
Source: MDPI journal article supplement (https://www.mdpi.com/2413-8851/4/4/79)
Supplement: s1 [file s1]

## Supplemental Materials:

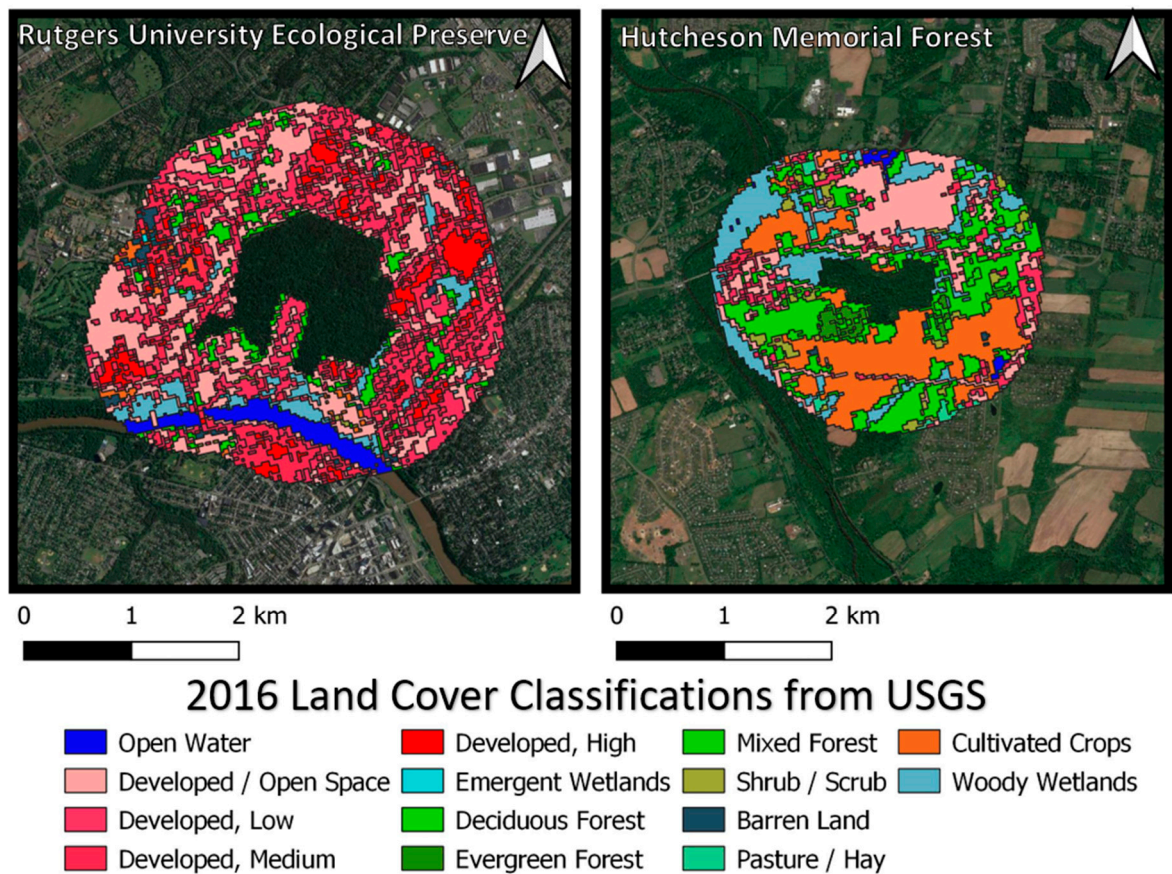

**Supplemental Figure S1:** United States Geological Survey land cover classifications from 2016 overlaid on a 1 km buffer around both the RUEP and HMF. While the RUEP is surrounded primarily by developed land (81%), HMF is surrounded primarily by undeveloped land (46%) with a mixture of developed land (28%), and agricultural land (24%).

## Survey

**Consent:** Thank you for agreeing to participate in a survey of attitudes toward citizen participation and perception towards forest sites. Your participation in this survey is voluntary. Completion of the survey will take approximately 5-10 minutes. You may quit the survey at any time. The survey asks for no names and the results will be reported in aggregate form. The results will be used to understand how individuals living in the surrounding neighborhoods of Hutcheson Memorial Forest and Rutgers Ecological Preserve perceive these forest spaces. You will get a \$10 Amazon Gift Card for your time in answering these questions today.

## Residential

1. Are you a local? (Less than a 15 minute drive without traffic to Hutcheson Memorial Forest or Rutgers Ecological Preserve)

- Yes
- No

2. If you answered yes to question 1, how long have you lived in this neighborhood?

- a. Less than a year
- b. 1-5 years
- c. 6-10 years
- d. 10-15 years
- e. 15+ years

If you are a non-local, where do you live? \_\_\_\_\_

3. What is your preferred environment to live in?

- a. Urban
- b. Suburban
- c. Small town
- d. Rural

*Study Site Specific*

4. Are you aware of either of the following natural sites in the area?

- a. Hutcheson Memorial Forest
- b. Rutgers Ecological Preserve

5. If yes to question 4, how often do you visit either site in a year?

- a. 1-3 times
- b. 4-6 times
- c. 6+ times
- d. I do not visit these sites

6. If you answered a,b, or c, what do you mostly use this forest area for?

- a. Athletic activity (hiking, biking, etc)
- b. Work related
- c. Volunteer work
- d. Birding and other natural activities (ex. tours)
- e. Other \_\_\_\_\_

7. Below are a few general questions about your local greenspace [either Hutcheson Memorial Forest or Rutgers Ecological Preserve] and will be made specific below. Please tell us how much you agree or disagree with each statement using a the following scale: 1 = disagree, 2 = slightly disagree, 3 = neutral, 4= slightly agree, 5 = agree

- a. The quality of this forest has excellent quality \_\_\_\_\_
- b. The forest is valuable to the community and the environment \_\_\_\_\_
- c. The forest serves a purpose to the environment and its inhabitants\_\_\_\_\_
- d. The forest has a diverse number of species\_\_\_\_\_
- e. The forest has a wide variety of birds\_\_\_\_\_
- f. People in my community believe that a sense of community is important \_\_\_\_\_
- g. I consider myself to be an environmentalist \_\_\_\_\_

- h. Protected lands take away from our freedom to enjoy them\_\_\_\_
- i. Most people in my community are not aware of this forest site \_\_\_\_

*Open Ended*

8. Do you know of any local environmental community groups in the neighborhood you live? If not please put N/A.

---

9. Are you aware of the site's purpose and/or history?

---

10. Are you aware of any bird species in the forest?

---

*General Demographic*

11. Gender

- a. Male
- b. Female
- c. Other

12. Ethnicity

---

13. Age

- a. 18-24
- b. 25-32
- c. 33-40
- d. 40-50
- e. 50+

14. Would you describe yourself as:

- a. Conservative
- b. Liberal
- c. Moderate
- d. Do not know
